# Supplementary material for: Rapid high-yield expression and purification of fully post-translationally modified recombinant clusterin and mutants
Source: PubMed Central journal article supplement (PMC7455699; doi:10.1038/s41598-020-70990-3), 2020-08-28
Supplement: 41598_2020_70990_MOESM1_ESM.pdf [file 41598_2020_70990_MOESM1_ESM.pdf]

## **Rapid high-yield expression and purification of fully post-translationally modified recombinant clusterin and mutants**

**Sandeep Satapathy<sup>1,2</sup>, Rebecca A Dabbs<sup>3</sup>, Mark R Wilson<sup>1,2,\*</sup>**

<sup>1</sup> Illawarra Health and Medical Research Institute, School of Chemistry and Molecular Bioscience, University of Wollongong, Wollongong, NSW, Australia. 2522.

<sup>2</sup> Molecular Horizons Research Institute, University of Wollongong, Wollongong, NSW. Australia. 2522.

<sup>3</sup> Burnett Institute, 85 Commercial Road, Melbourne, VIC. 3004. Australia

\* Corresponding author. *Postal address:* Rm 313, Building 42 (Molecular Horizons), University of Wollongong. Northfields Avenue, Wollongong. NSW. 2522. Australia; *Telephone:* +61242214534; *Email:* [mrw@uow.edu.au](mailto:mrw@uow.edu.au).

### **Supplementary Materials**

**Supplementary Materials S1: Full length amino acid sequences of different *r*CLU constructs  
(see main text Figure 2)**

**Key for constructs 1-4 (twin Streptag):**

MMKTLLLFVGLLLTWESGQVLG: signal peptide sequence

**GGGG**: 4 x glycine spacer

**SAWSHPQFEKGGGSGGGSGGSAWSHPQFEK**: twin Streptag sequence

**1. *r*CLU- $\alpha$ N-ST**

MMKTLLLFVGLLLTWESGQVLGDQTVS**GGGG****SAWSHPQFEKGGGSGGGSGGSAWSHPQFEKGGGG****DNELQEMSNQGSKYVNKEIQNAVNGVKQIKTLIEKTNEERKTLLSNLEEAKK**  
KKEDALNETRESETKCLKELPGVCNETMMALWEECKPCLKQTCMKFYARVCRSGSGLVGR  
QLEEFNLQSSPFYFWMNGDRIDSLENDRQQTHMLDVMQDHFSSRASSIIDELFQDRFFFTREP  
QDTYHYLPFSLPHRRPHFFPKSRIVRSLMPFSPYEPLNFHAMFQPFLEMIHEAQQAMDIHF  
HSPAFQHPPTEFIREGDDDRTVCREIRHNSTGCLRMKDQCDKCREILSVDCSTNPNPSQAKLR  
RELDESLQVAERLTRKYNELLKSYQWKMLNTSSLLEQLNEQFNWVSRLANLTQGEDQYY  
LRVTTVASHTSDSDVPSGVTEVVVKLFDSDPITVTPVEVSRKNPKFMETVAEKALQEYRK  
KHREE

**2. *r*CLU- $\alpha$ C-ST**

MMKTLLLFVGLLLTWESGQVLGDQTVSDNELQEMSNQGSKYVNKEIQNAVNGVKQIKTL  
IEKTNEERKTLLSNLEEAKKKEDALNETRESETKCLKELPGVCNETMMALWEECKPCLKQ  
TCMKFYARVCRSGSGLVGRQLEEFNLQSSPFYFWMNGDRIDSLENDRQQTHMLDVMQD  
HFSRASSIIDELFQDRFFFTREPQDTYHYLPFSLPHRRPHFFPK**GGGG****SAWSHPQFEKGGG**  
**SGGGSGGSAWSHPQFEKGGG****RIVRSLMPFSPYEPLNFHAMFQPFLEMIHEAQQAMDIHF**  
HSPAFQHPPTEFIREGDDDRTVCREIRHNSTGCLRMKDQCDKCREILSVDCSTNPNPSQAKLR  
RELDESLQVAERLTRKYNELLKSYQWKMLNTSSLLEQLNEQFNWVSRLANLTQGEDQYY  
LRVTTVASHTSDSDVPSGVTEVVVKLFDSDPITVTPVEVSRKNPKFMETVAEKALQEYRK  
KHREE

### 3. *r*CLU-βN-ST

MMKTLLLFVGLLLTWESGQVLGDQTVSDNELQEMSNQGSKYVNKEIQNAVNGVKQIKTL  
IEKTNEERKTLLSNLEEAKKKKEDALNETRESETKCLKELPGVCNETMMALWEECKPCLKQ  
TCMKFYARVCRSGSGLVGRQLEEFLNQSSPFYFWMNGDRIDSLENDRQQTHMLDVMQD  
HFSRASSIIDELFQDRFFTREPQDTYHYLPFSLPHRRPHFFFPKSRIVRSGGGGSAWSHPOFE  
KGGGSGGGSGGSAWSHPOFEKGGGGLMPFSPYEPLNFHAMFQPFLEMIHEAQQAMDIH  
FHSPAFQHPPTEFIREGDDDRTVCREIRHNSTGCLRMKDQCDKCREILSVDCSTNNPSQAKL  
RRELDLQVAERLTRKYNELLKSYQWKMLNTSSLLEQLNEQFNWWSRLANLTQGEDQY  
YLRVTTVASHTSDSDVPSGVTEVVVKLFDSDPITVTPVEVSRKNPKFMETVAEKALQEYR  
KKHREE

### 4. *r*CLU-βC-ST

MMKTLLLFVGLLLTWESGQVLGDQTVSDNELQEMSNQGSKYVNKEIQNAVNGVKQIKTL  
IEKTNEERKTLLSNLEEAKKKKEDALNETRESETKCLKELPGVCNETMMALWEECKPCLKQ  
TCMKFYARVCRSGSGLVGRQLEEFLNQSSPFYFWMNGDRIDSLENDRQQTHMLDVMQD  
HFSRASSIIDELFQDRFFTREPQDTYHYLPFSLPHRRPHFFFPKSRIVRSLMPFSPYEPLNFHA  
MFQPFLEMIHEAQQAMDIHFHSPAFQHPPTEFIREGDDDRTVCREIRHNSTGCLRMKDQCD  
KCREILSVDCSTNNPSQAKLRRELDLQVAERLTRKYNELLKSYQWKMLNTSSLLEQLNE  
QFNWWSRLANLTQGEDQYYLRVTTVASHTSDSDVPSGVTEVVVKLFDSDPITVTPVEVS  
RKNPKFMETVAEKALQEYRKKHREEGGGGSAWSHPOFEKGGGSGGGSGGSAWSHPOF  
EK

**Key for construct 5 (C-tag):**

MMKTLLLFVGLLLTWESGQVLG: signal peptide sequence

EPEA: C-tag

**5. rCLU-CT:**

MMKTLLLFVGLLLTWESGQVLGDQTVSDNELQEMSNQGSKYVNKEIQNAVNGVKQIKTL  
IEKTNEERKTLLSNLEEAKKKKEDALNETRESETKLLKELPGVCNETMMALWEECKPCLKQ  
TCMKFYARVCRSGSLVGRQLEEFLNQSSPFYFWMNGDRIDSLENDRQQTHMLDVMQD  
HFSRASSIIDELFQDRFFTREPQDTYHYLPFSLPHRRPHFFFPKSRIVRSLMPFSPYEPLNFHA  
MFQPFLEMIHEAQQAMDIHFHSPAFQHPPTEFIREGDDDRTVCREIRHNSTGCLRMKDQCD  
KCREILSVDCSTNNPSQAKLRRELDLQVAERLTRKYNELLKSYQWKMLNTSSLLEQLNE  
QFNWVSRLANLTQGEDQYYLRVTTVASHTSDSDVPSGVTEVVVKLFDSDPITVTPVEVS  
RKNPKFMETVAEKALQEYRKKHREEEPEA

## Supplementary Materials S2:

### Immuno dot blot detection of *rCLU-CT* secreted by MEXi 293E cells

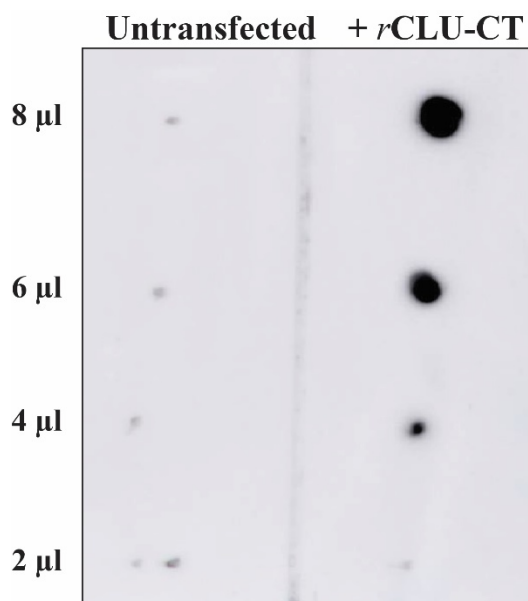

**Figure S2 Immuno dot blot detection of *rCLU-CT* secreted by MEXi 293E cells.** Culture supernatant (CS) from MEXi 293E cells overexpressing *rCLU-CT* was harvested on day 5 post transfection. Different volumes of CS (indicated at left side of image) taken from untransfected cells (grown for 6 days, left) or transfected cells expressing *rCLU-CT* (right) were spotted onto a nitrocellulose membrane. Specific immunodetection of *rCLU-CT* was performed as described in Methods. The image shown is representative of 2 independent experiments.

**Supplementary Materials S3:**

**Complete SDS PAGE images corresponding to manuscript Figures 3B, 4A and 7A**

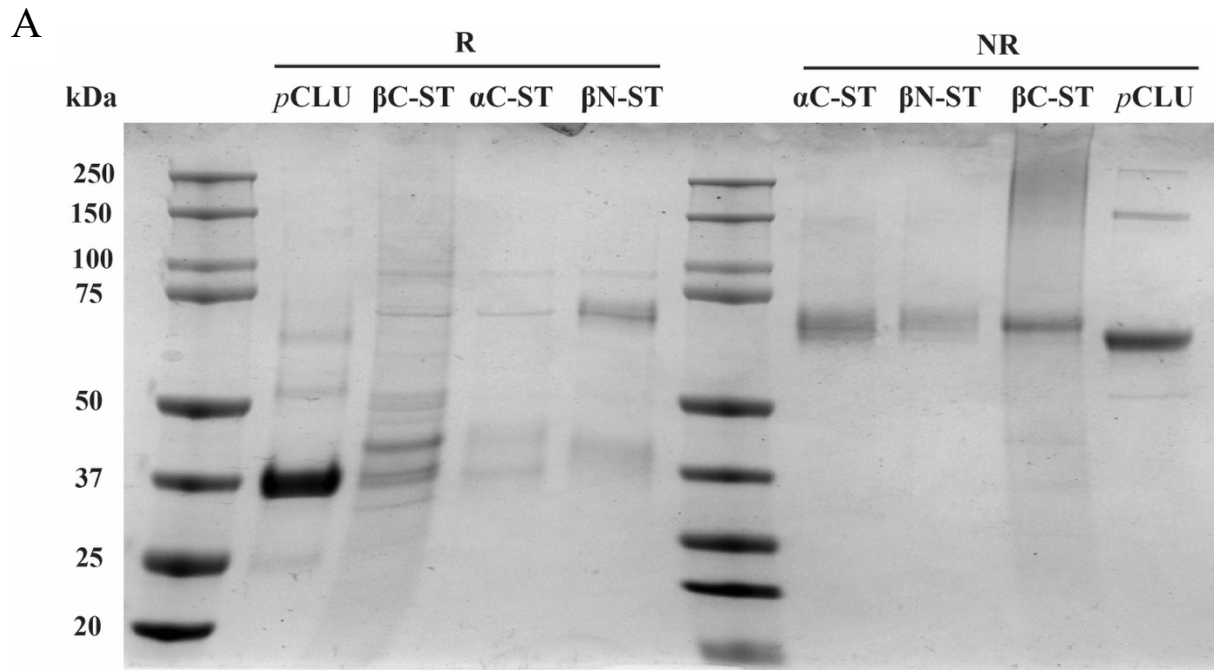

**Figure S3A.** Complete image of SDS PAGE of purified *r*CLU- $\beta$ N-ST, *r*CLU- $\alpha$ C-ST, *r*CLU- $\beta$ C-ST and *p*CLU. The molecular mass of protein standards (left lane) are shown in kDa. Reduced (R) and Non-reduced (NR) lanes are indicated above the image. Both panels shown in main text Figure 3B have been taken from this image.

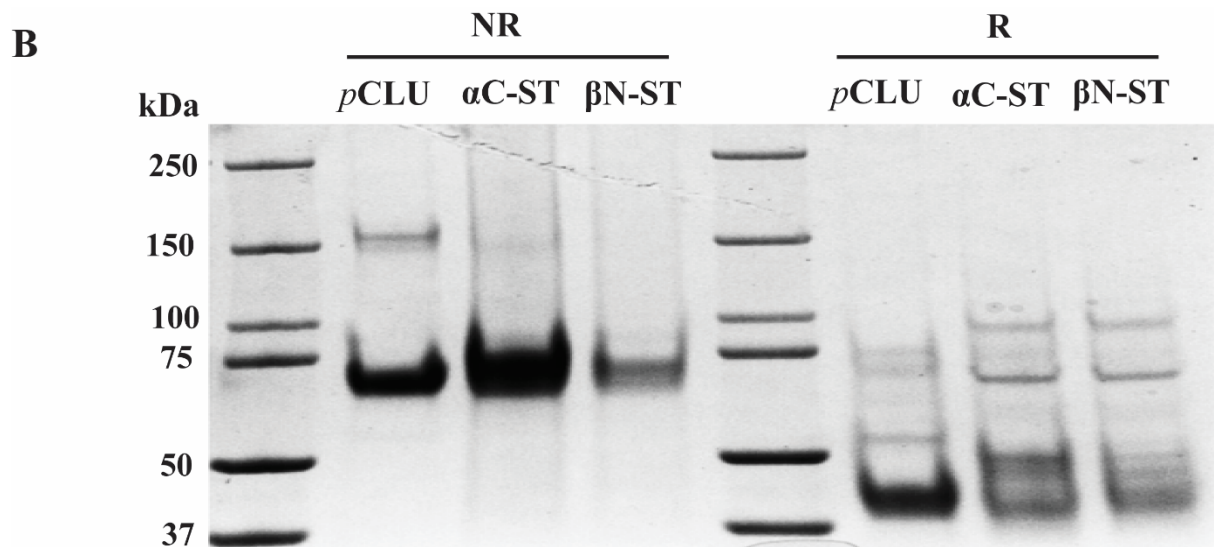

**Figure S3B.** Complete image of SDS PAGE analysis of purified *p*CLU, *r*CLU- $\alpha$ C-ST and *r*CLU- $\beta$ N-ST under non-reducing (NR) and reducing (R) conditions. The molecular mass of protein standards (left lane) are shown in kDa. The left and middle panels in main text Figure 4A are taken from this image.

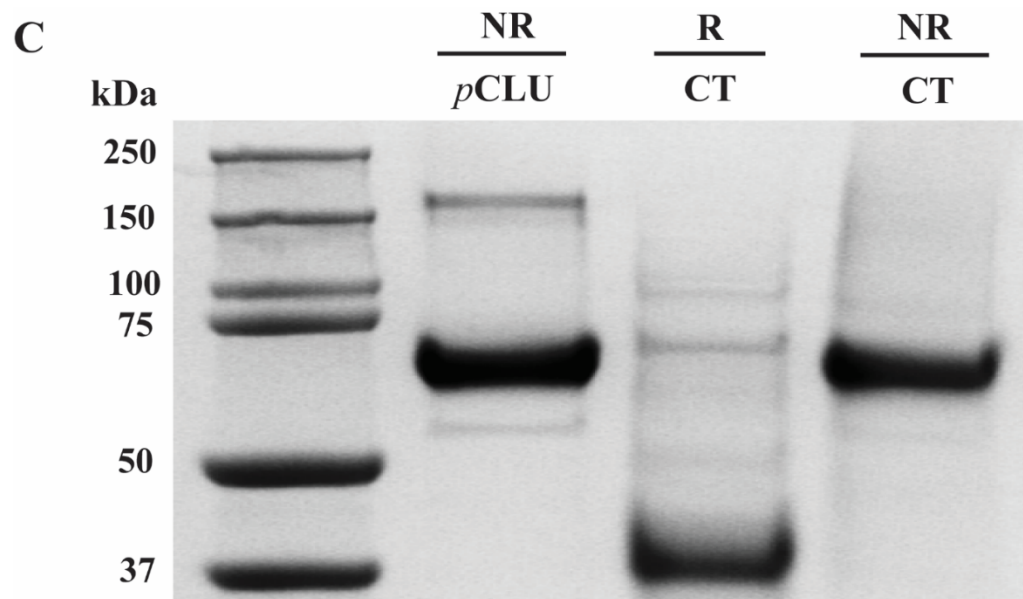

**Figure S3C.** Complete image of SDS PAGE analysis of purified *p*CLU, *r*CLU-CT under non-reducing (NR) and reducing conditions (R). The molecular mass of protein standards (left lane) are shown in kDa. The right panel in main text Figure 4A is taken from this image.



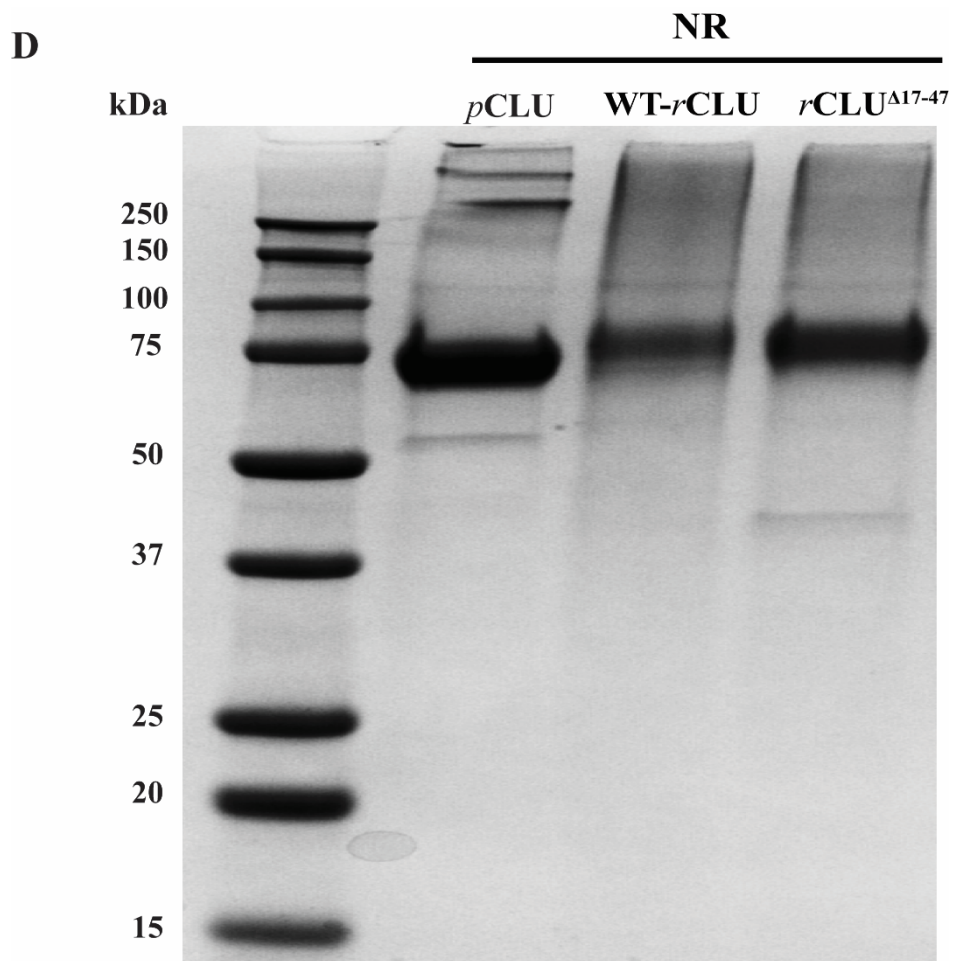

**Figure S3D.** Complete image of SDS-PAGE analyses of wild type and mutant *r*CLU under non-reducing conditions (NR). *p*CLU, full length WT-*r*CLU- $\alpha$ C-ST (WT-*r*CLU) and a CLU deletion mutant *r*CLU<sup>Δ17-47</sup>- $\alpha$ C-ST (in which residues 17-47 were deleted) were analysed by SDS PAGE. The molecular mass of protein standards (left lane) are shown in kDa. The left panel in main text Figure 7A is taken from this image.

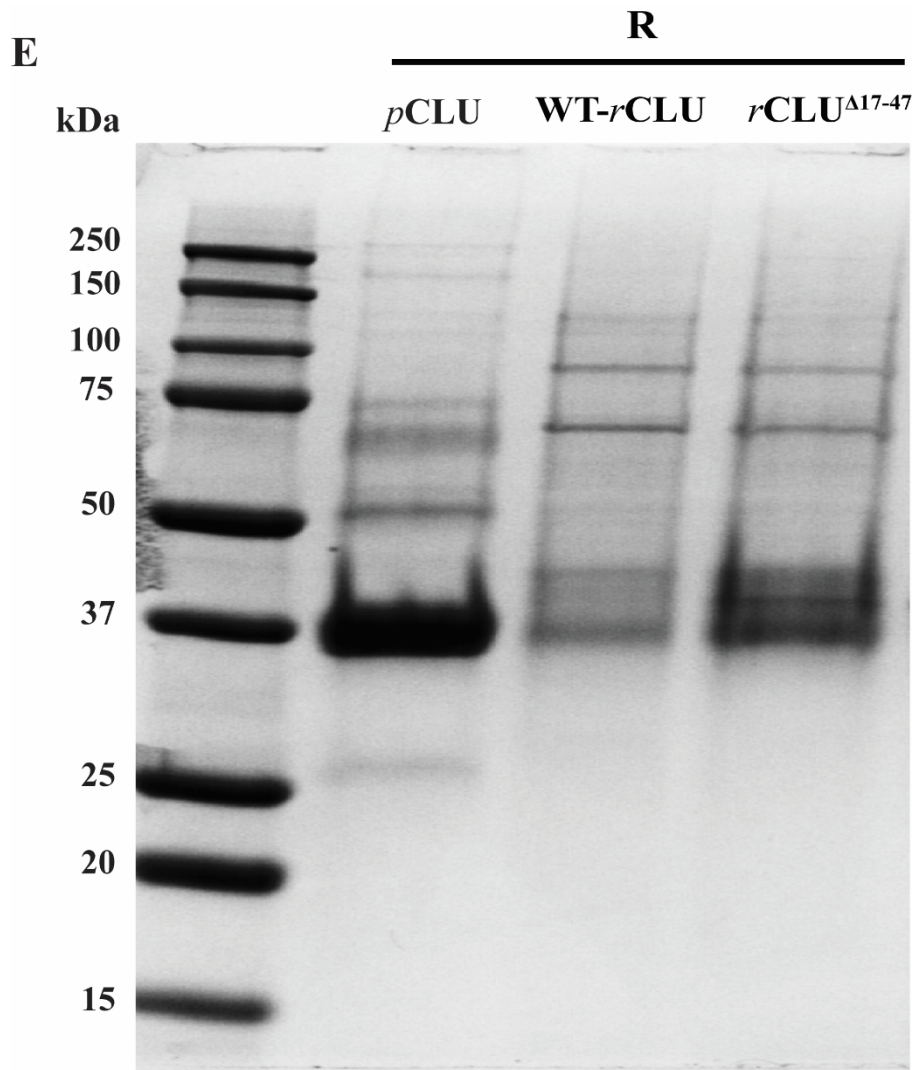

**Figure S3E.** Complete image of SDS-PAGE analyses of wild type and mutant *r*CLU under reducing conditions (R). *p*CLU, full length WT-*r*CLU- $\alpha$ C-ST (WT-*r*CLU) and a CLU deletion mutant *r*CLU<sup>Δ17-47</sup>- $\alpha$ C-ST (in which residues 17-47 were deleted) were analysed by SDS PAGE. The molecular mass of protein standards (left lane) are shown in kDa. The right panel in main text Figure 7A is taken from this image.
